# Supplementary material
Source: bioRxiv or medRxiv preprint supplement (https://medrxiv.org/highwire/filestream/75304/field_highwire_adjunct_files/1/2020.04.02.20051136-2.pdf)
Supplement: Supplementary file [file 2020.04.02.20051136-2.pdf]

**Table 2S. Top-ranking laboratory parameters extracted from random forest algorithm based on order of importance.**

| <b>Rank</b> | <b>laboratory Parameters (Abbreviation)</b> | <b>Reference Range</b>     |
|-------------|---------------------------------------------|----------------------------|
| 1           | Lactate Dehydrogenase (LDH)                 | 115-220 (U/L)              |
| 2           | Calcium (Ca)                                | 2.17-2.75 (mmol/L)         |
| 3           | Creatinine (CREA)                           | 31.8-93.7 (umol/L)         |
| 4           | Total Protein (TP)                          | 60-85 (g/L)                |
| 5           | Total Bilirubin (TBIL)                      | 2-20 (umol/L)              |
| 6           | Basophil (BA#)                              | 0-0.1 (10 <sup>9</sup> /L) |
| 7           | Platelet Distribution Width (PDW)           | 9.8-16.1 (fl)              |
| 8           | Kalium (K)                                  | 3.5-5.5 (mmol/L)           |
| 9           | Magnesium (Mg)                              | 0.6-1.1 (mmol/L)           |
| 10          | Creatine Kinase Isoenzyme (CK-MB)           | 0-25 (U/L)                 |
| 11          | Glucose (GLU)                               | 3.89-6.11 (mmol/L)         |
